# Supplementary material for: Aggregation-induced emission characteristics and solvent triggered hierarchical self-assembled chiral superstructures of naphthalenediimide amphiphiles
Source: Royal Society of Chemistry journal article supplement (doi:10.1039/c9nj05137f), 2019-12-31
Supplement: c9nj05137f1.pdf [file c9nj05137f1.pdf]

## Supplementary Information

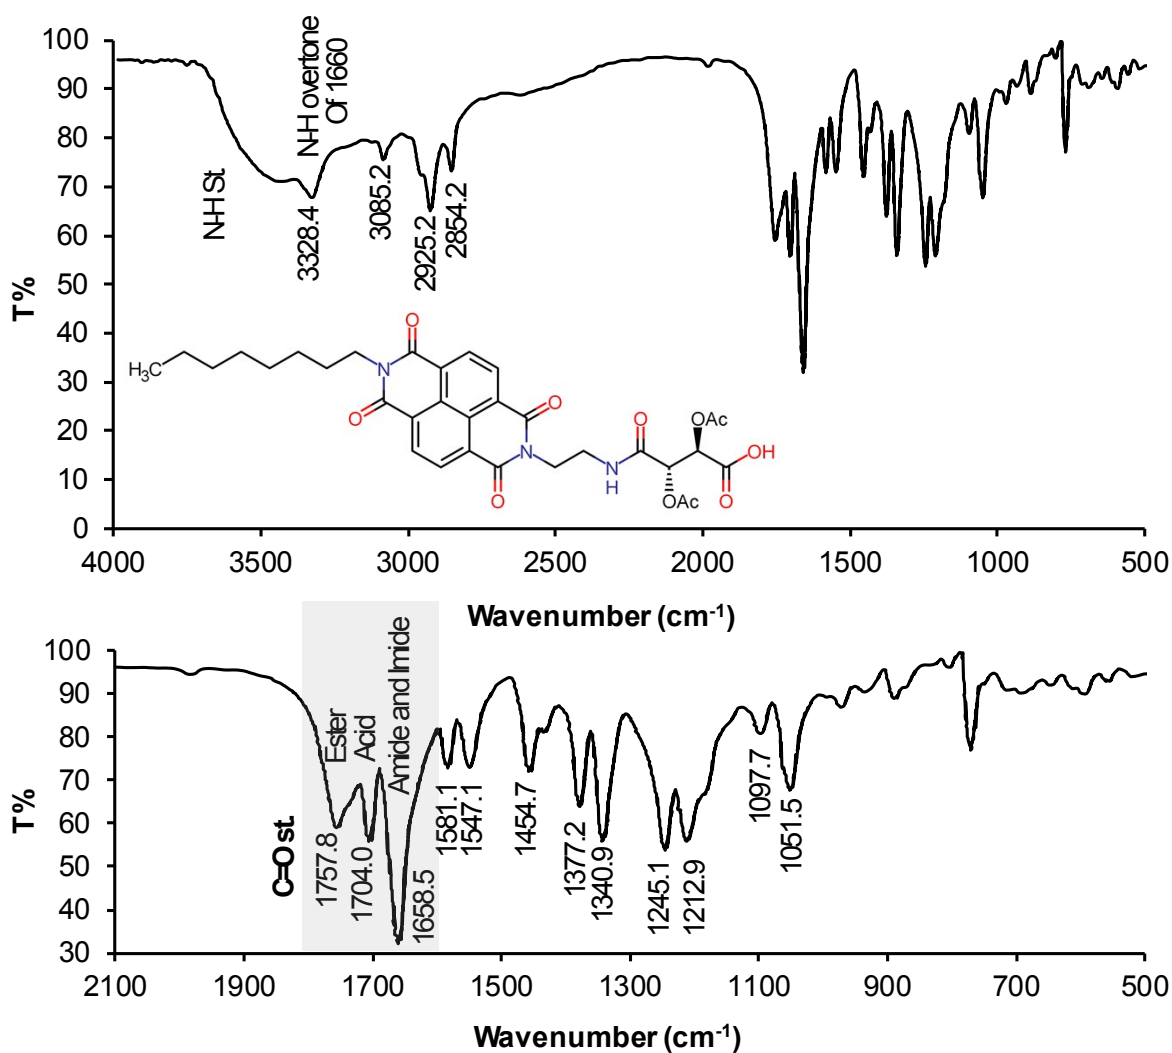

Fig. S1 FT-IR spectra of NDI-TA1 powder.

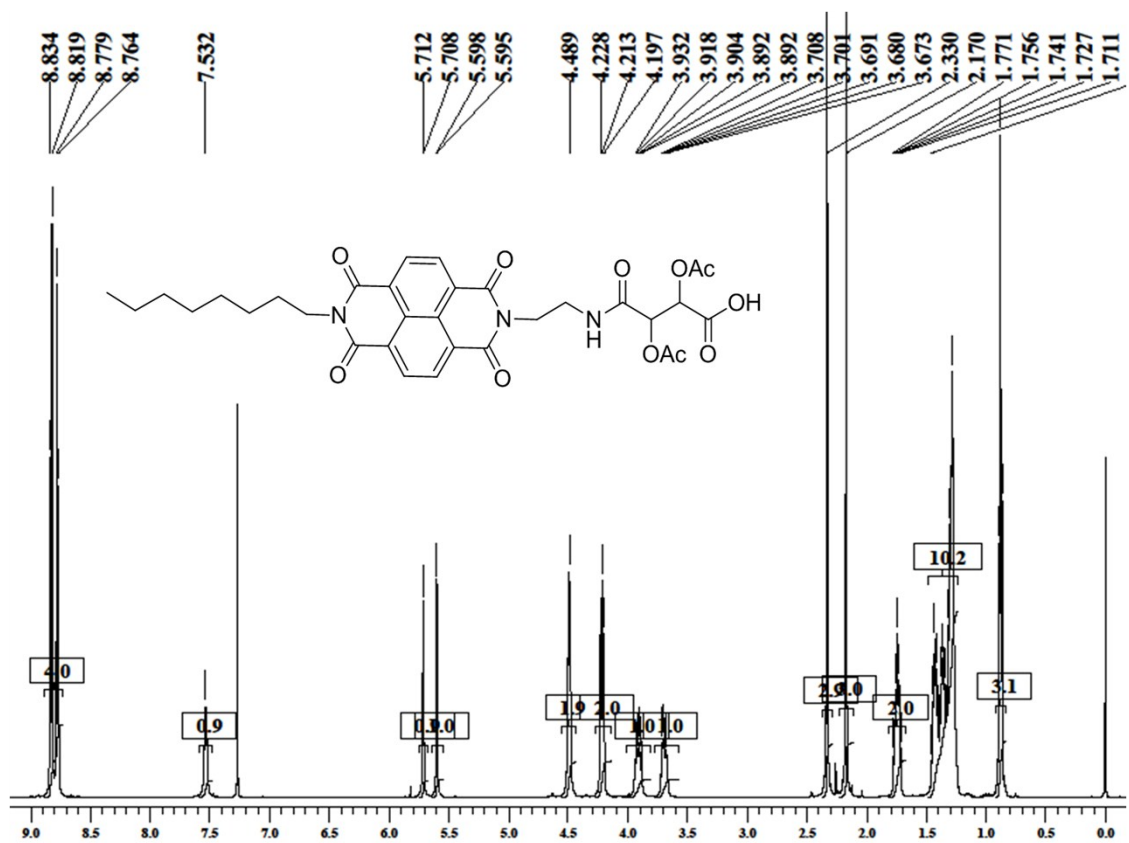

Fig. S2 <sup>1</sup>H NMR spectra of compound NDI-TA1.

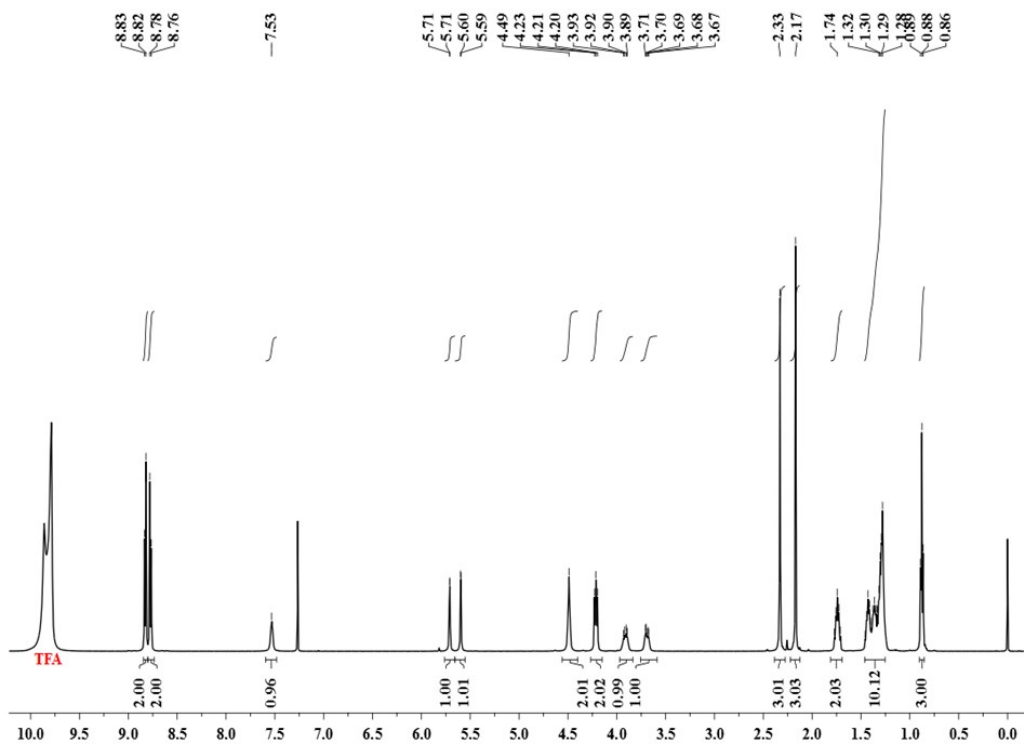

Fig. S3 <sup>1</sup>H NMR spectra of compound NDI-TA1 (TFA-*d*).

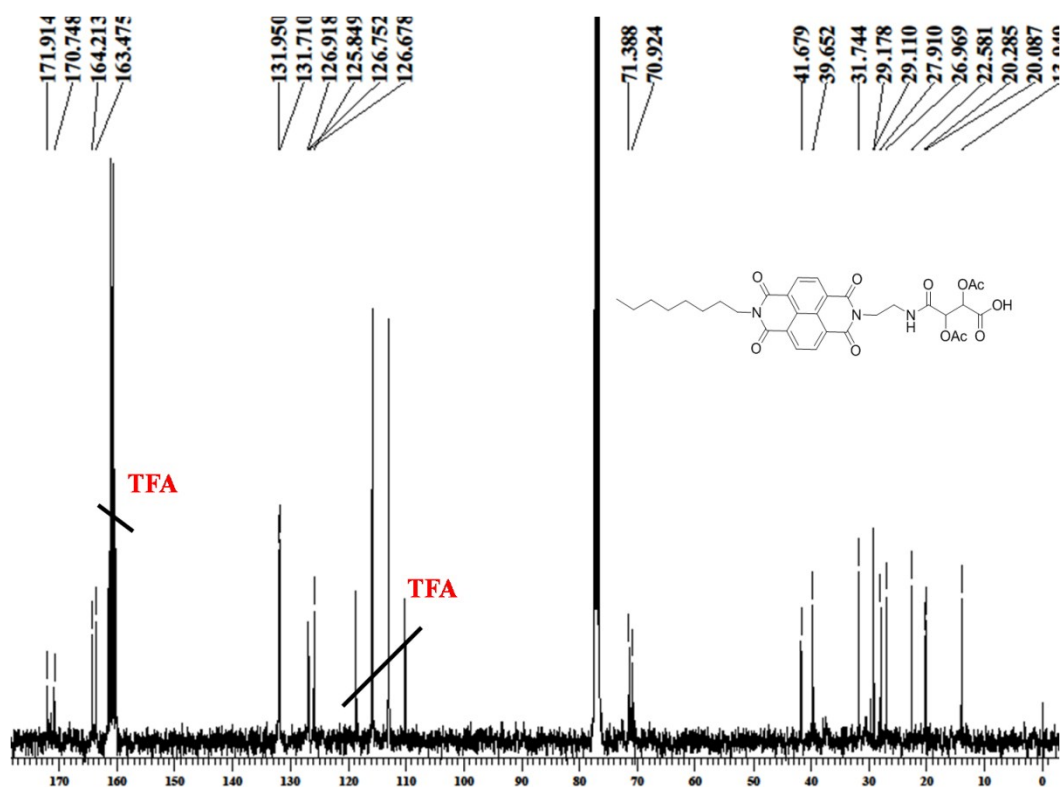

Fig. S4 <sup>13</sup>C NMR spectra of compound NDI-TA1.

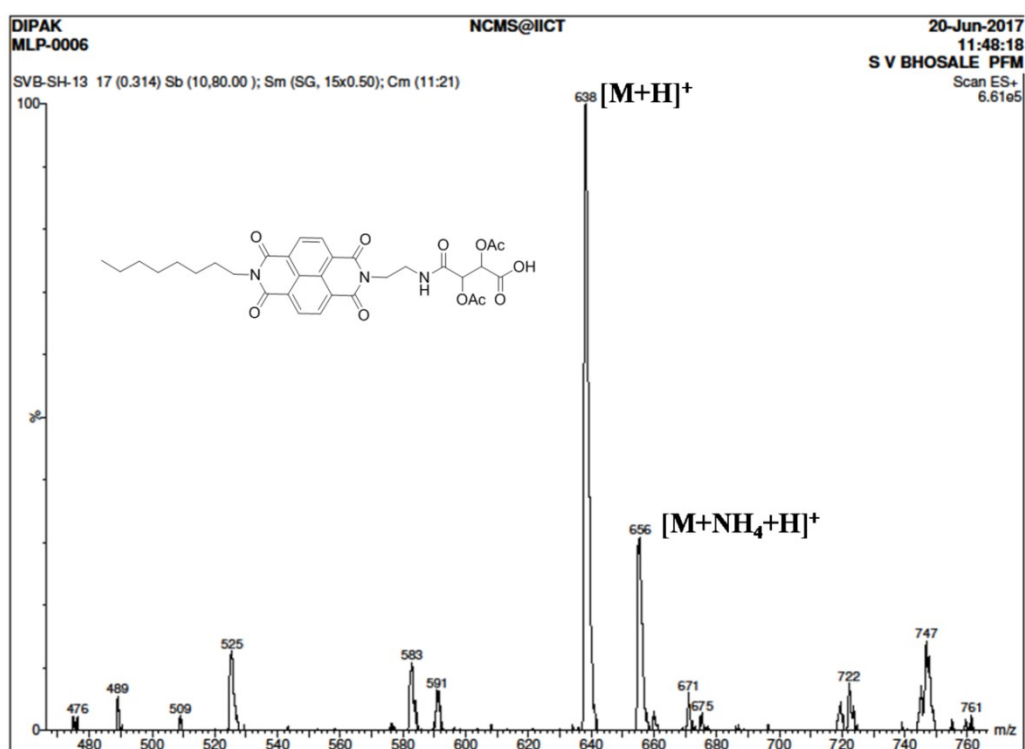

Fig. S5 ESI mass spectra of compound NDI-TA1.

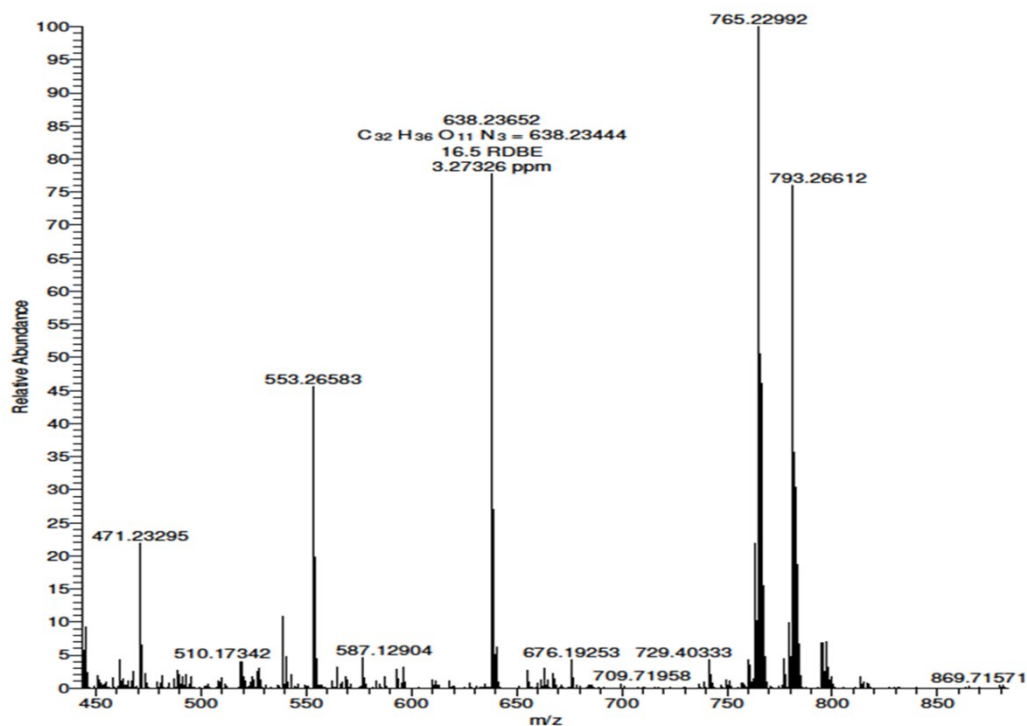

Fig. S6 HRMS spectra of compound NDI-TA1.

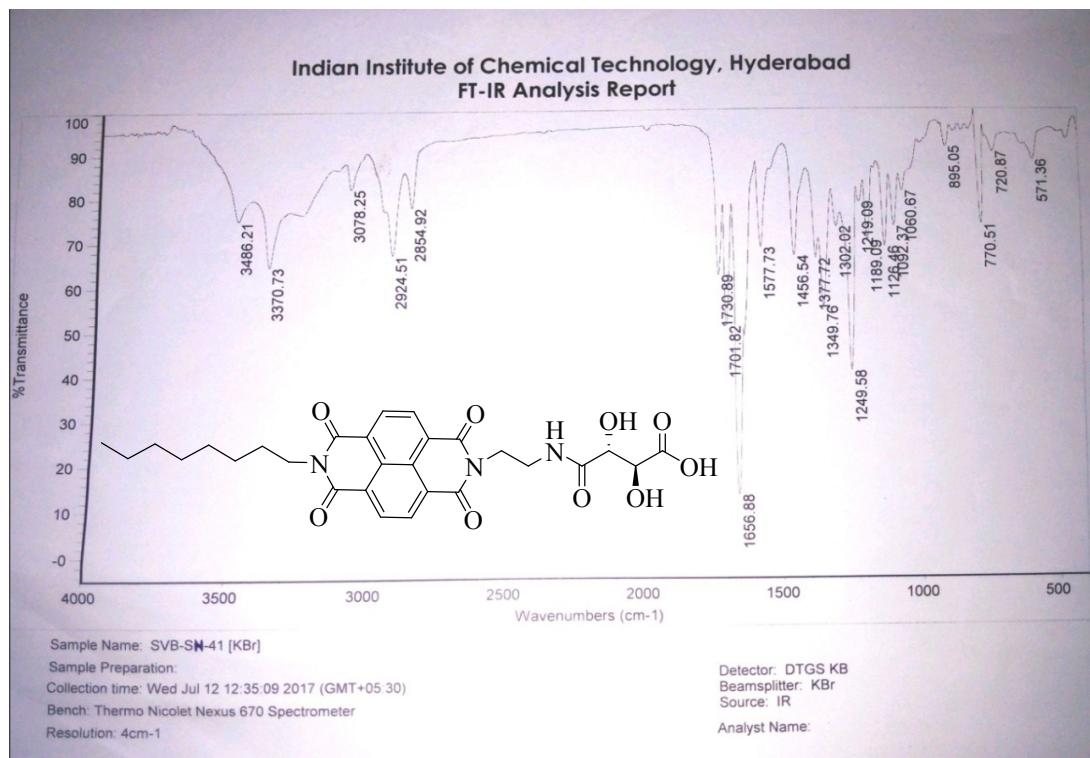

Fig.S7 FT-IR spectra of compound NDI-TA2.

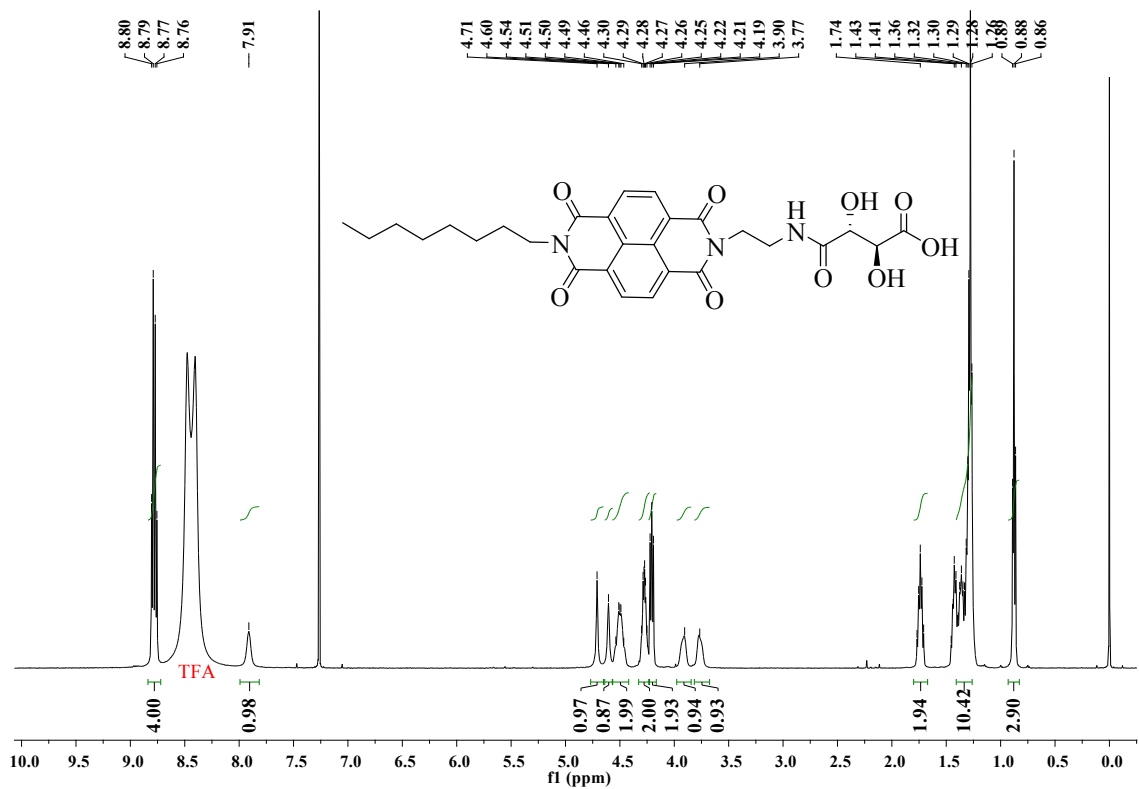

S8  $^1\text{H}$  NMR spectra of compound NDI-TA2.

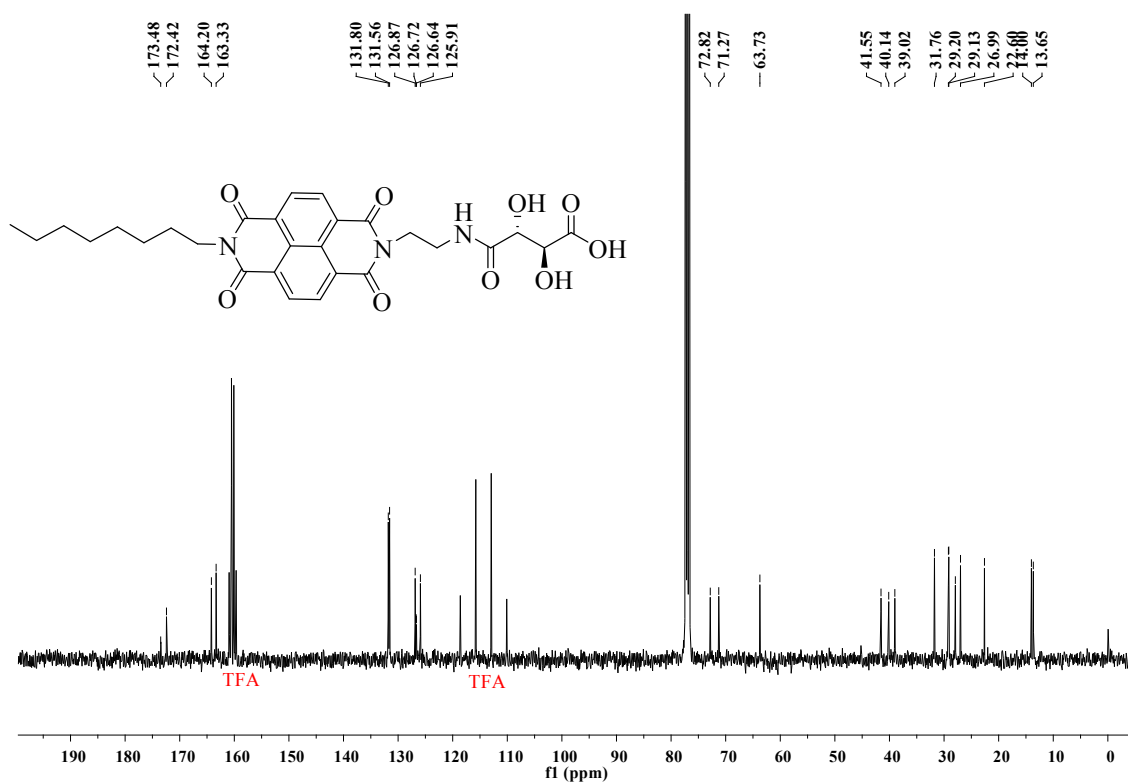

=== FAC DIVISION @ CSIR-IICT ===

Sample Name : Ganesh  
 Sample ID : GVK-GS-253  
 Original Data File : D:\LCMS\Data\ESI-APCI Mass\2019\12-12-2019\GVK-GS-253.lcd

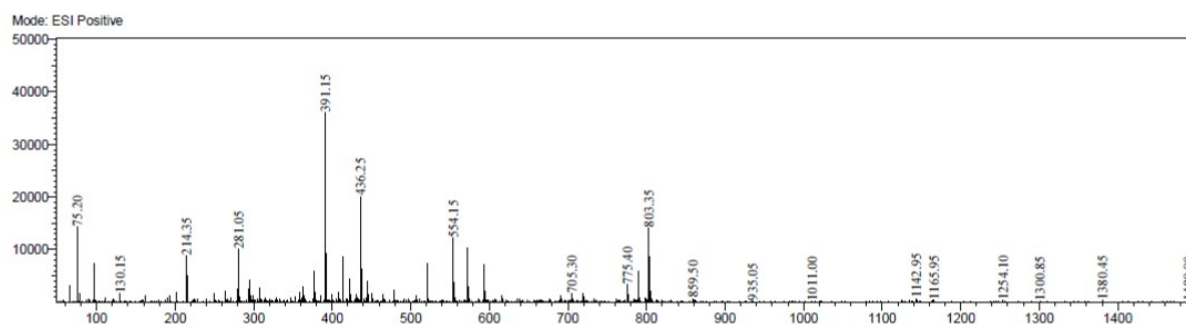

Fig. S10 ESI mass spectrum of compound NDI-TA2.

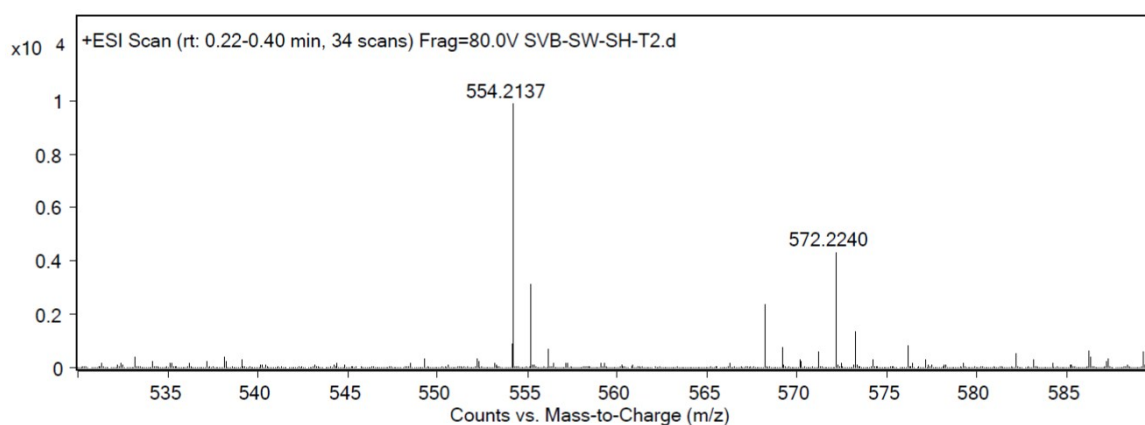

Peak List

| m/z     | Abund     |
|---------|-----------|
| 59.0494 | 233563.31 |

Formula Calculator Element Limits

| Element | Min | Max |
|---------|-----|-----|
| C       | 0   | 30  |
| H       | 0   | 60  |
| O       | 0   | 9   |
| N       | 0   | 5   |
| S       | 0   | 2   |
| F       | 0   | 0   |
| Cl      | 0   | 1   |

Formula Calculator Results

| Formula       | Best | Mass     | Tgt Mass | Diff (ppm) | Ion Species   | Score |
|---------------|------|----------|----------|------------|---------------|-------|
| C28 H32 N3 O9 | True | 554.2142 | 554.2139 | -0.58      | C28 H32 N3 O9 | 99.46 |

Fig. S11 ESI HRMS spectrum of compound NDI-TA2.

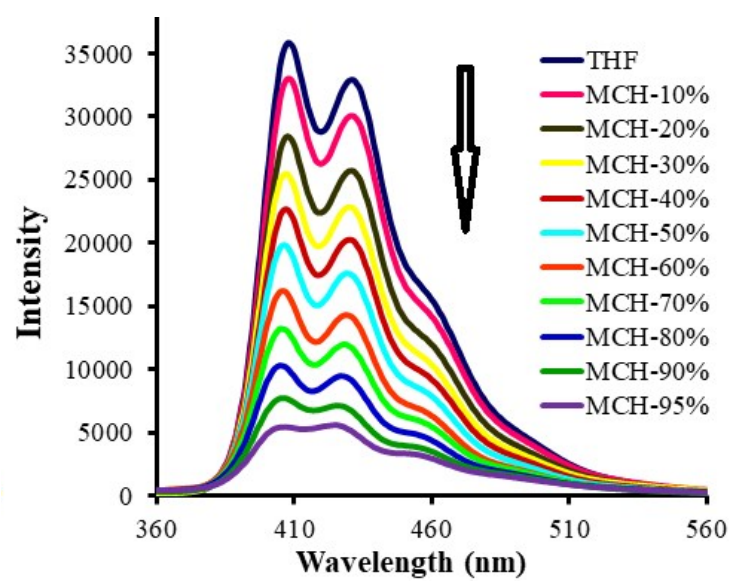

**Fig.S12** Emission spectra ( $\lambda_{\text{ex}} = 350 \text{ nm}$ ) of NDI-TA2 in THF solution ( $1 \times 10^{-5} \text{ M}$ ) while titration with MCH (0 – 95% v/v). It can be clearly seen that upon gradual addition with increase in volume ratios fluorescence emission is diminishing which is related to ACQ effect.

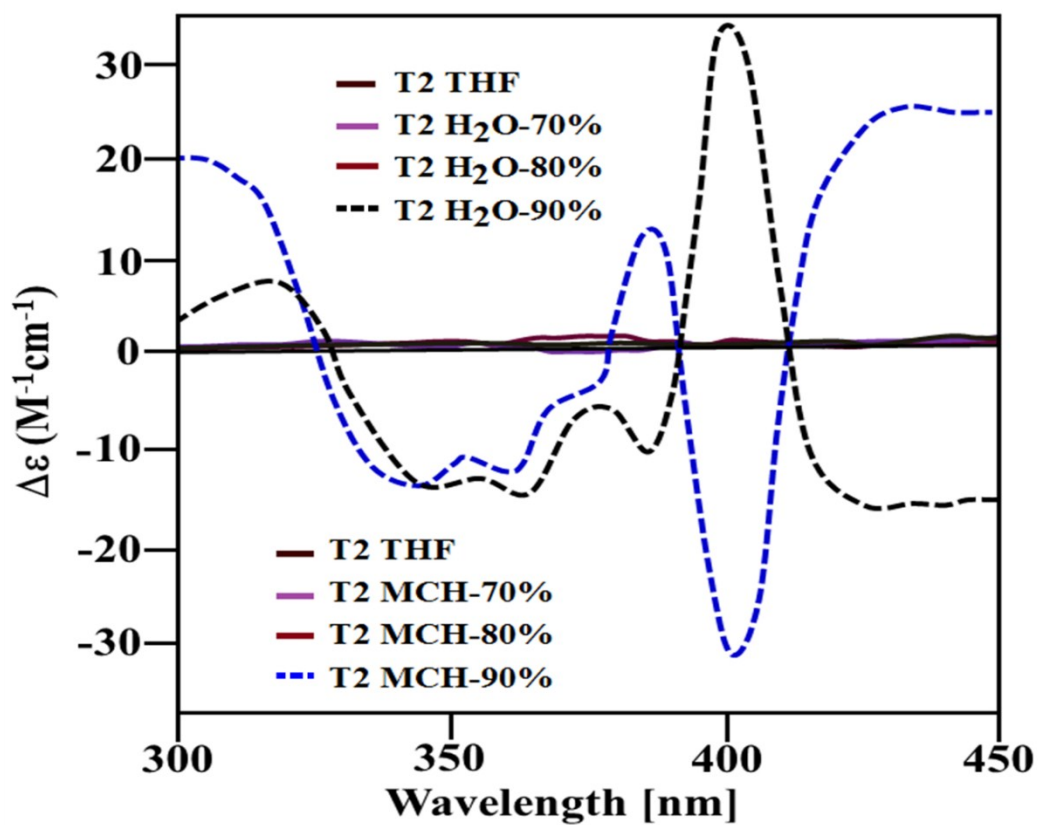

**Fig. S13** The circular dichroism (CD) spectra of NDI-TA2 at various THF/MCH and THF/water volume ratios. THF/MCH v/v 10:90 (dotted blue curve) and THF/Water v/v 10:90 (dotted black curve).



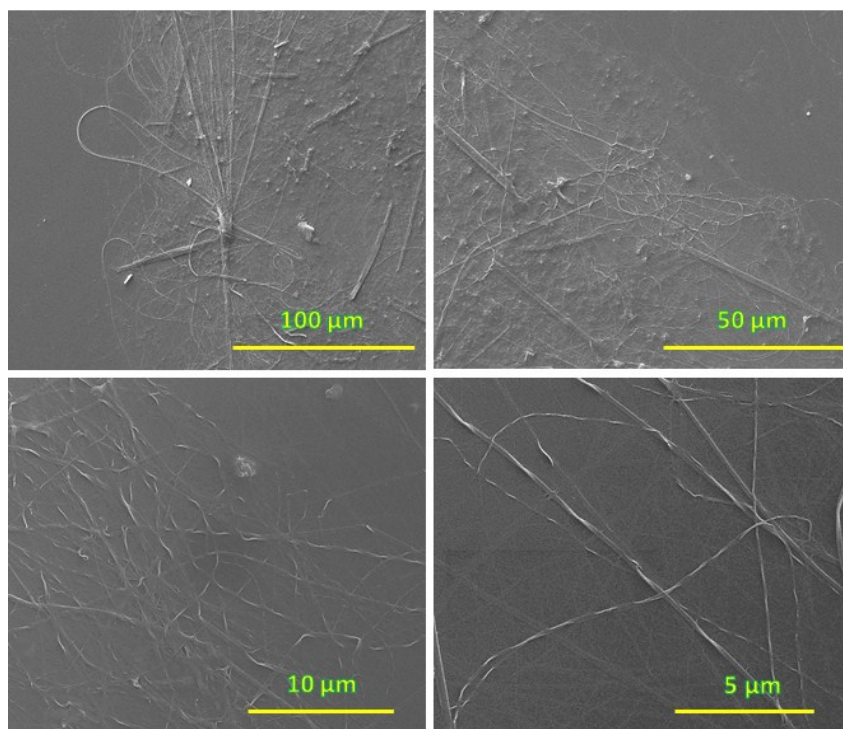

**Fig. S14** SEM micrograph of NDI-TA1 self-assembled solid deposited from THF:MCH 10:90, images with various sizes (wide view).

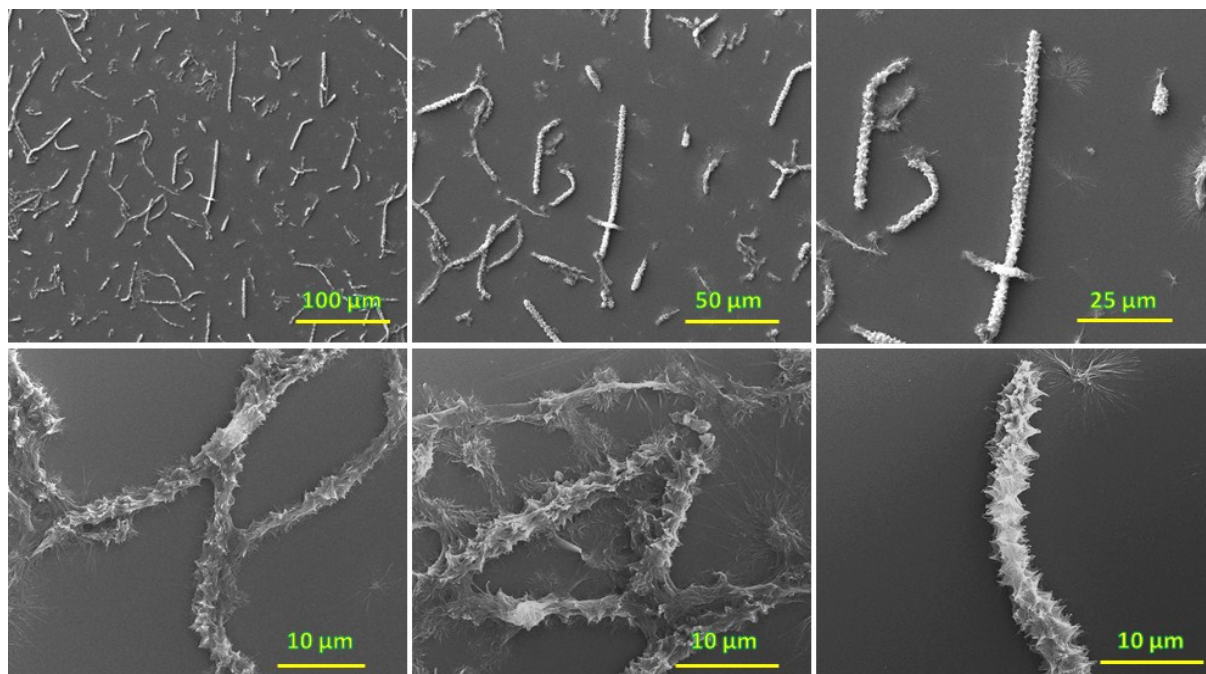

**Fig. S15** SEM micrograph of NDI-TA1 self-assembled solid deposited from THF:MCH 30:70, images with various sizes (wide view).

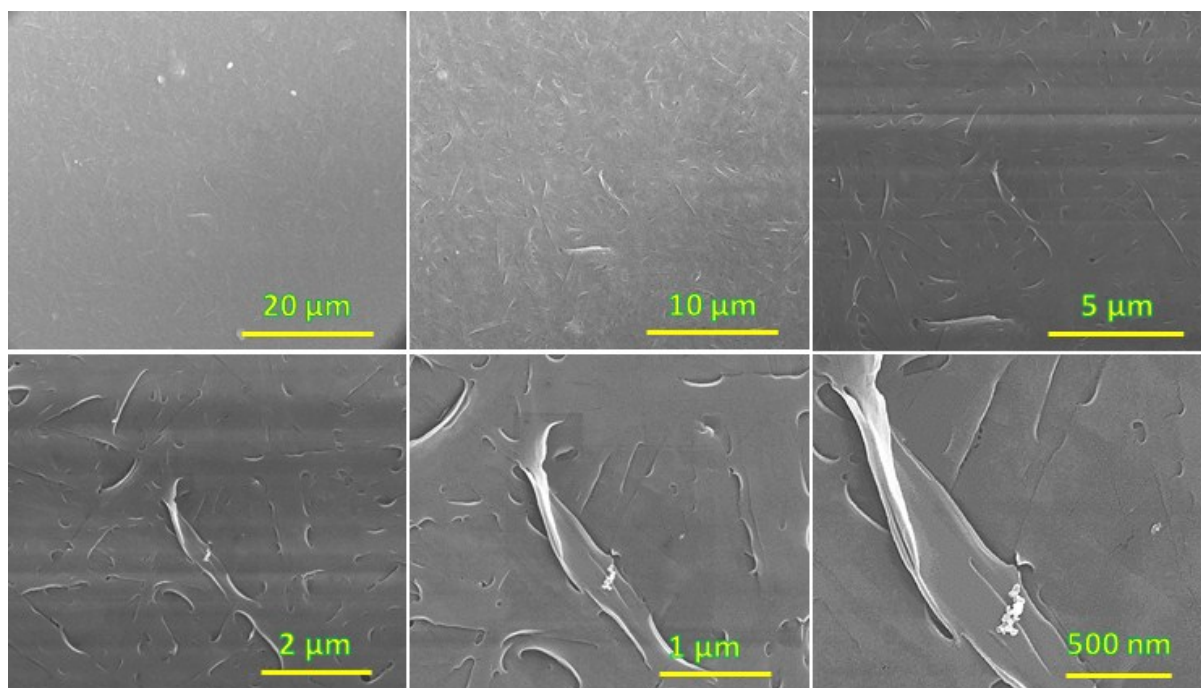

**Fig. S16** SEM micrograph of NDI-TA2 self-assembled solid deposited from THF:MCH 30:70, images with various sizes 20 μm to 500 nm..

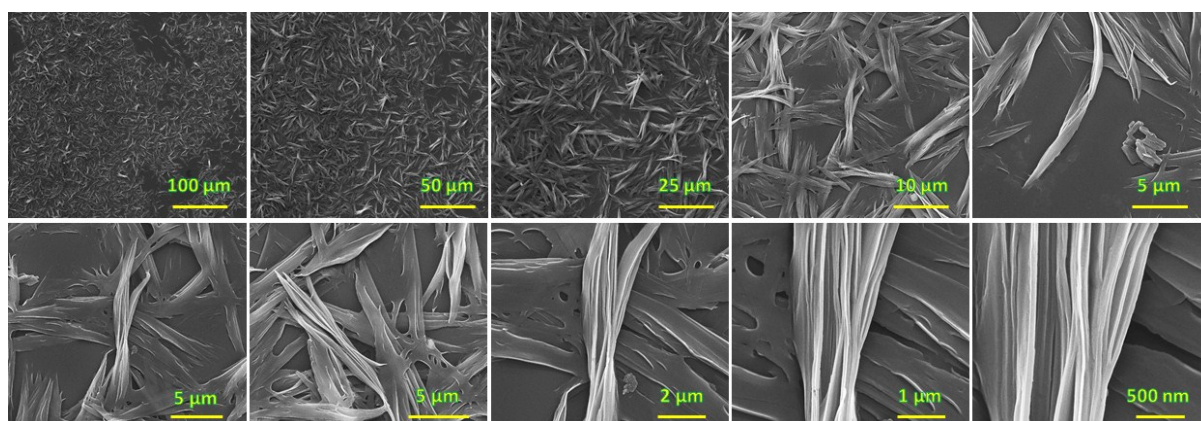

**Fig. S17** SEM micrograph of NDI-TA2 self-assembled solid deposited from THF:MCH 10:90, images with various sizes 100 μm to 500 nm.

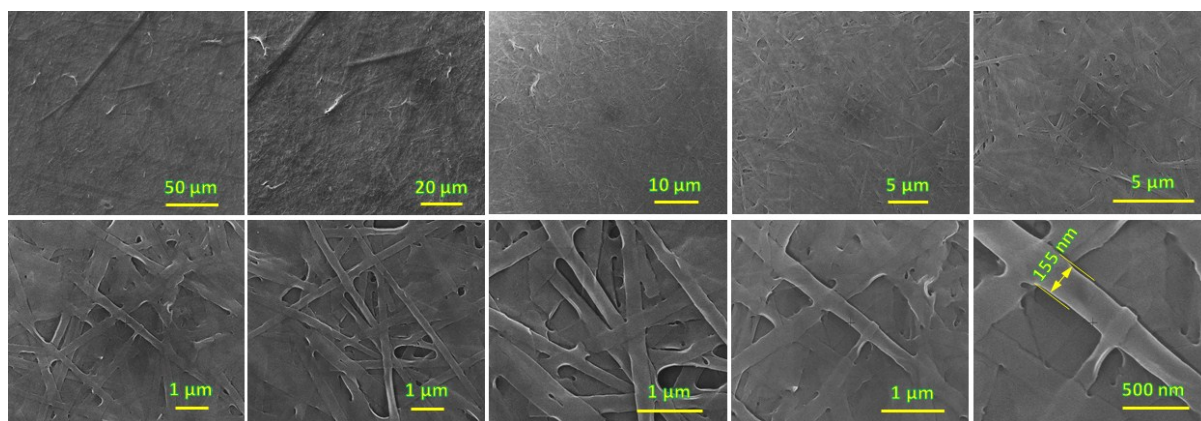

**Fig. S18** SEM micrograph (wide view) of NDI-TA1 self-assembled solid deposited from THF:water 30:70 with varying image sizes 50 μm to 500 nm.

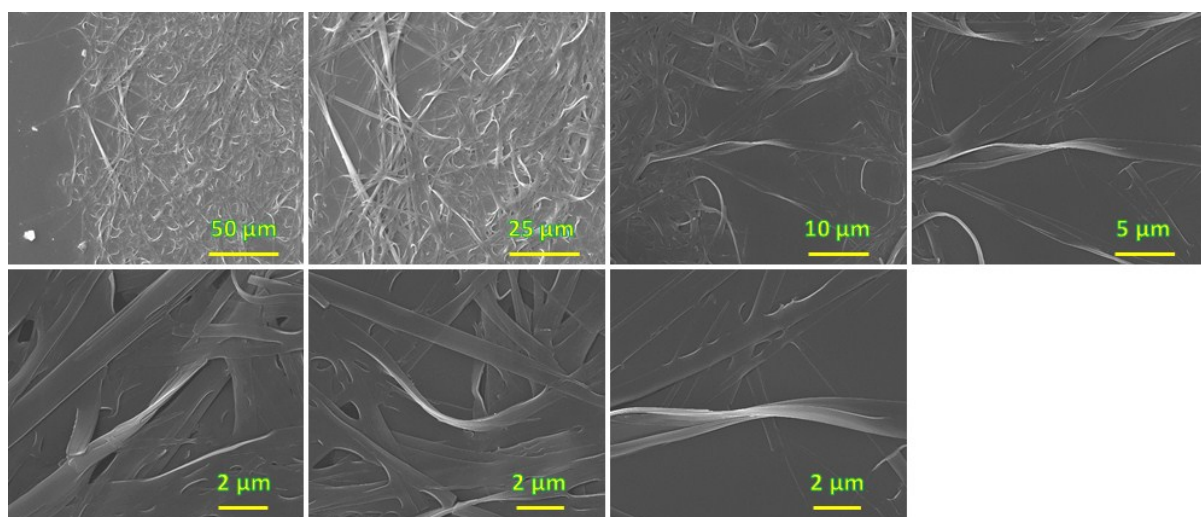

**Fig. S19** SEM micrograph of NDI-TA2 self-assembled solid deposited from THF:water 30:70, images with various sizes 50 μm to 500 nm..



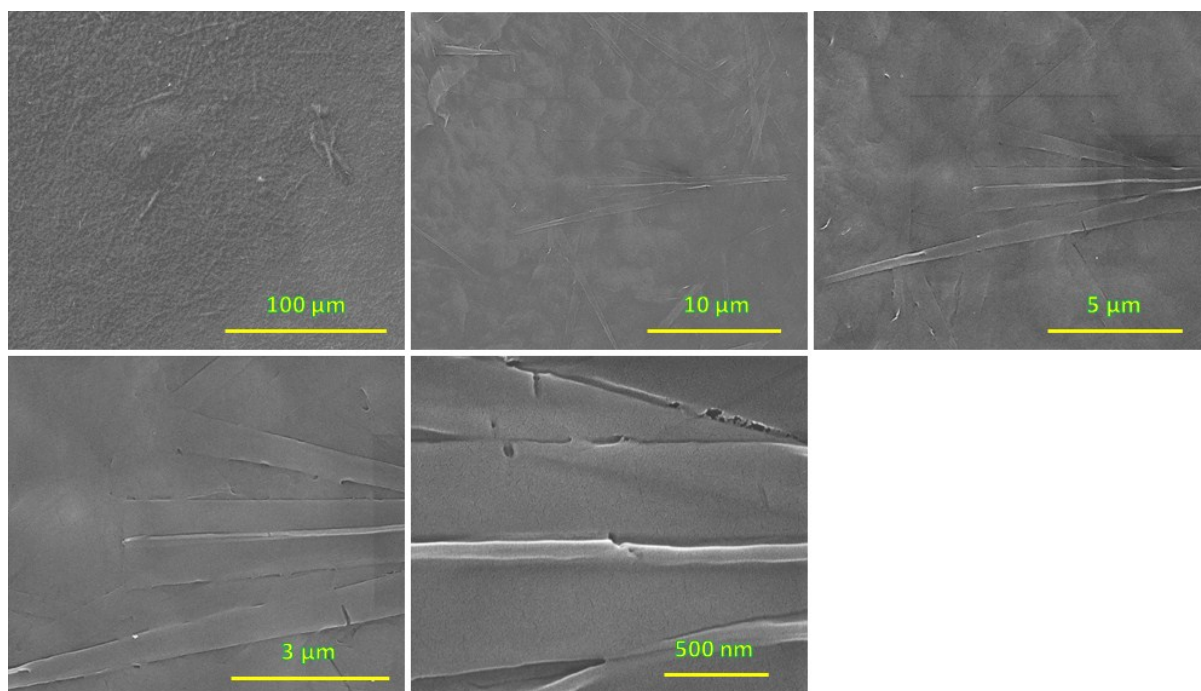

**Fig. S20** SEM micrograph of NDI-TA1 (wide view) self-assembled solid deposited from THF:water 10:90 with varying image sizes 100 μm to 500 nm.

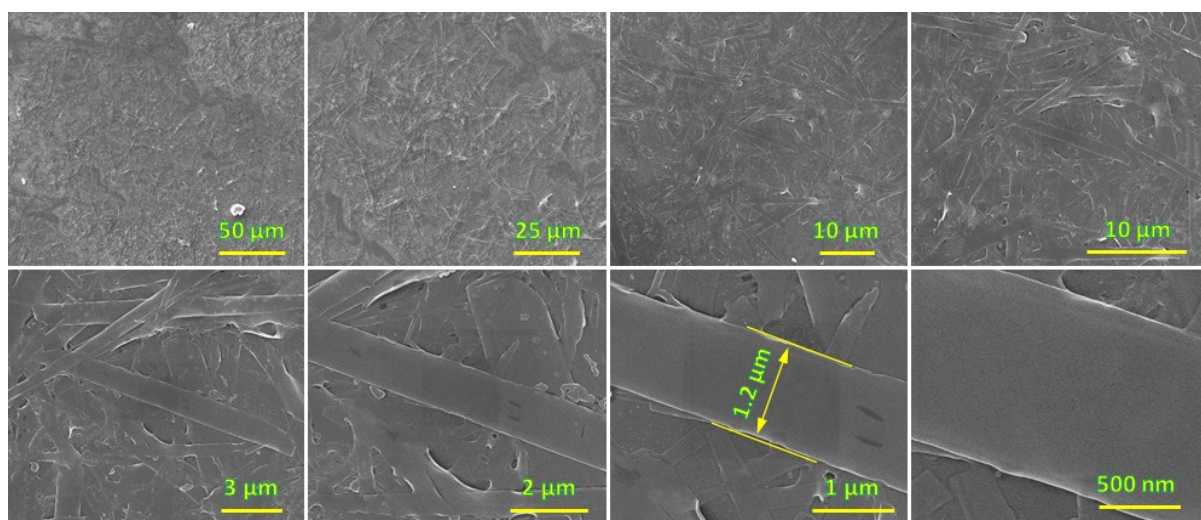

**Fig. S21** SEM micrograph of NDI-TA2 self-assembled solid deposited from THF:water 10:90 (v/v), images with various sizes 50 μm to 500 nm.

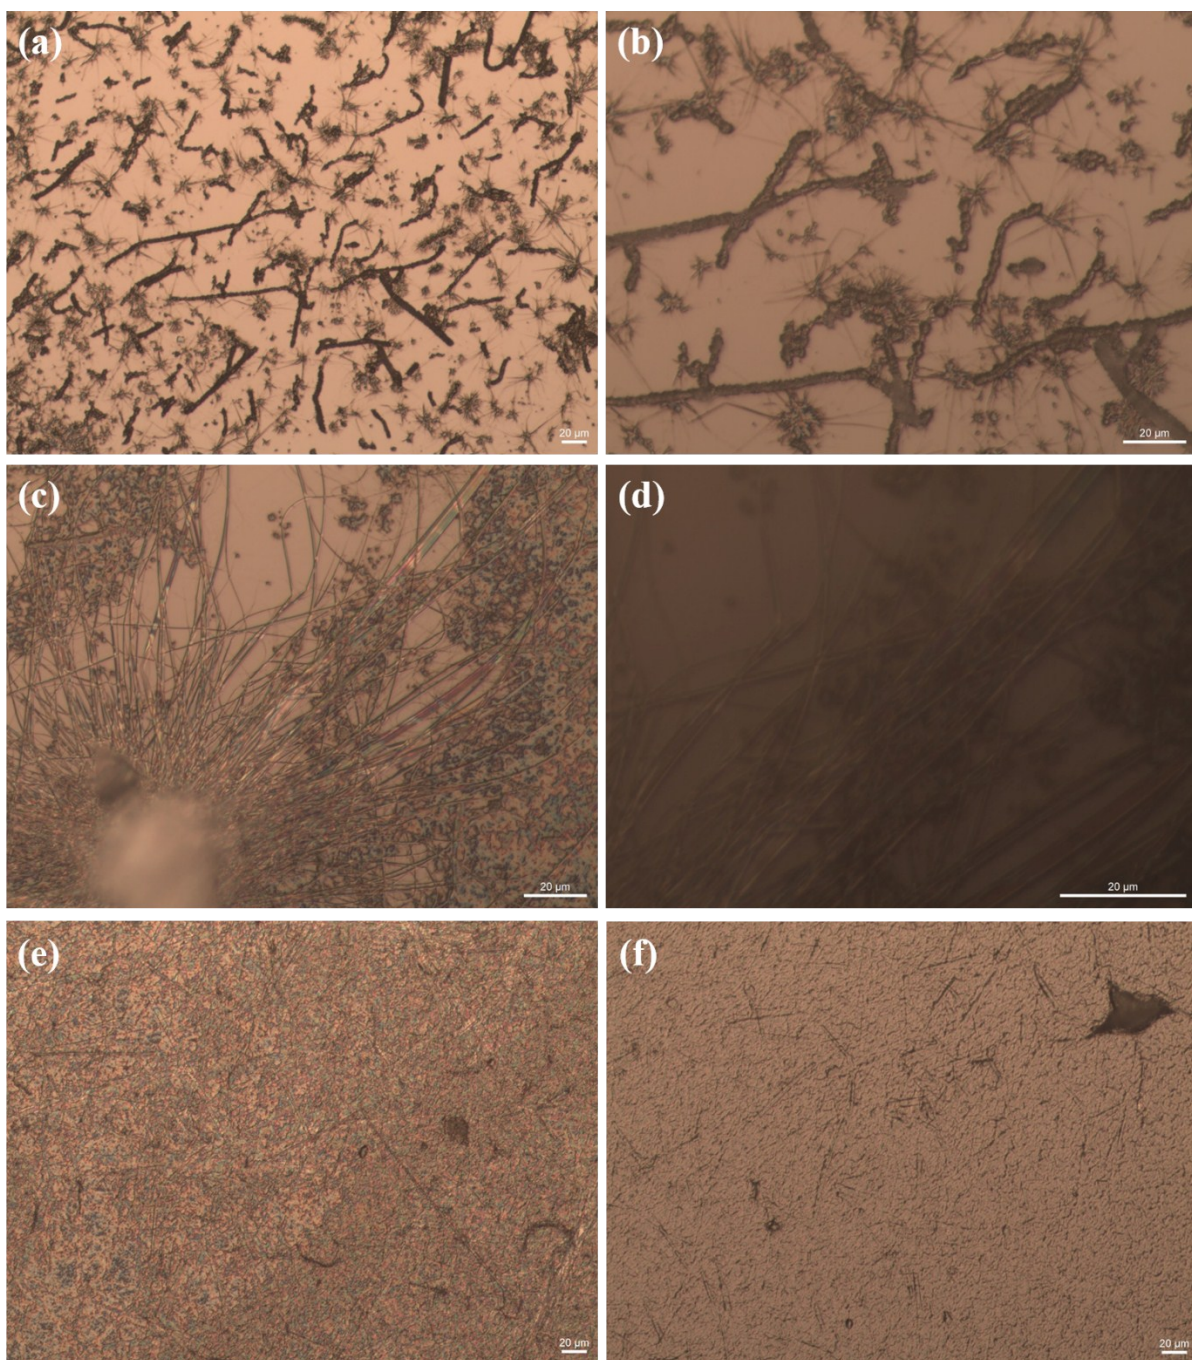

**Fig. S22** POM images of NDI-TA1 from (a,b) THF:MCH (30:70, v/v); (c,d) THF:MCH (10:90, v/v); (e) THF:water (30:70, v/v) and (f) THF:water (10:90, v/v).



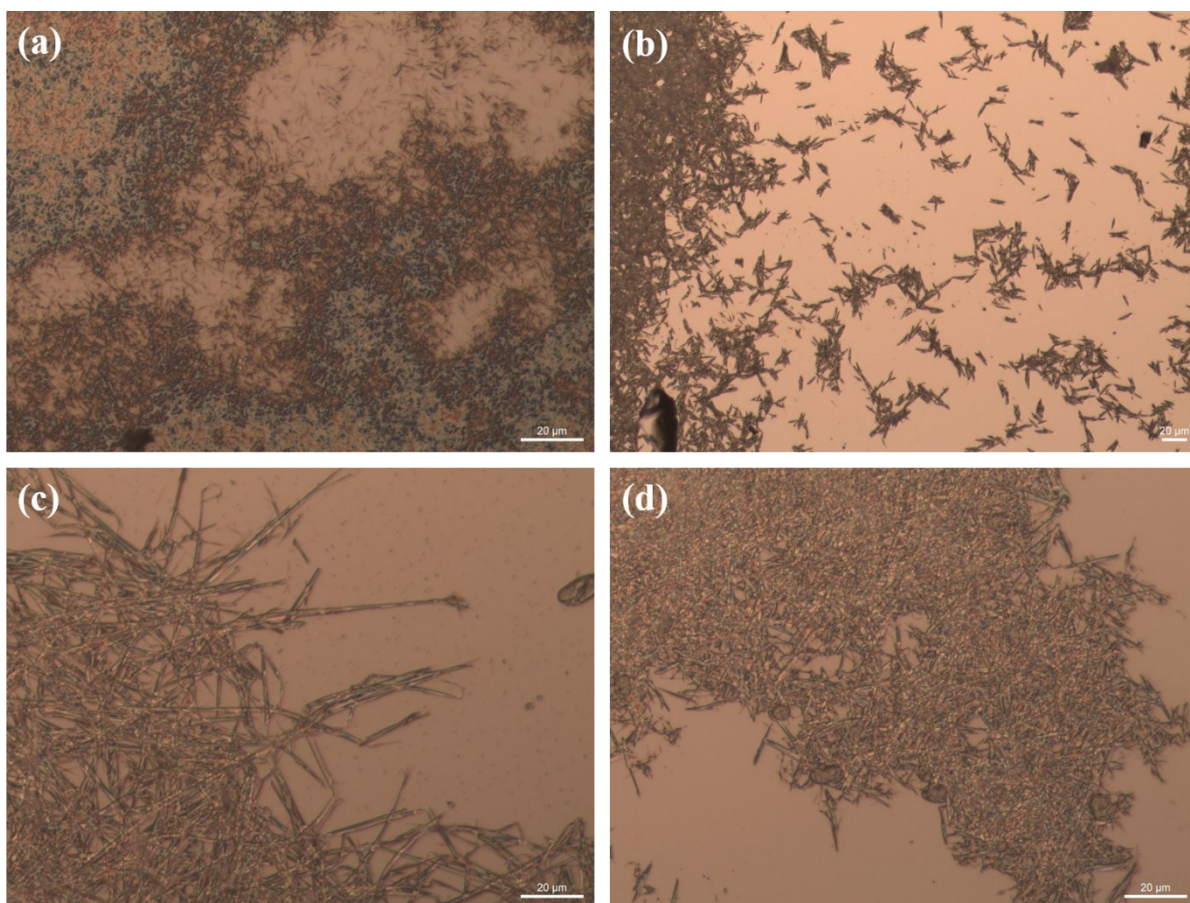

**Fig. S23** POM images of NDI-TA2 from (a) THF:MCH (30:70, v/v); (b) THF:MCH (10:90, v/v); (c) THF:water (30:70, v/v) and (d) THF:water (10:90, v/v).

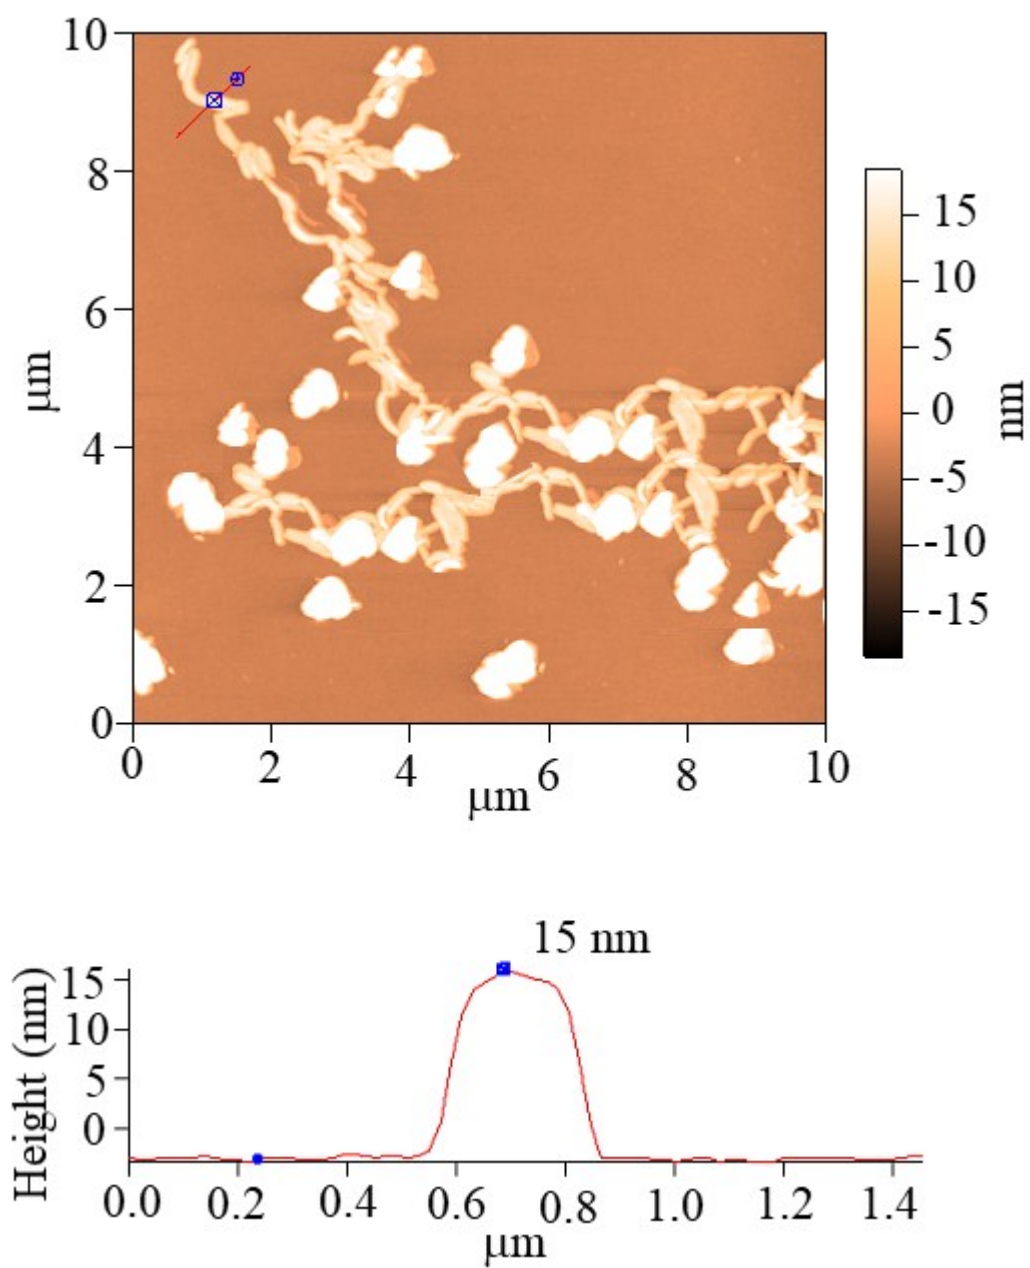

**Fig. S24** AFM image of NDI-TA1 from THF:MCH (30:70, v/v).

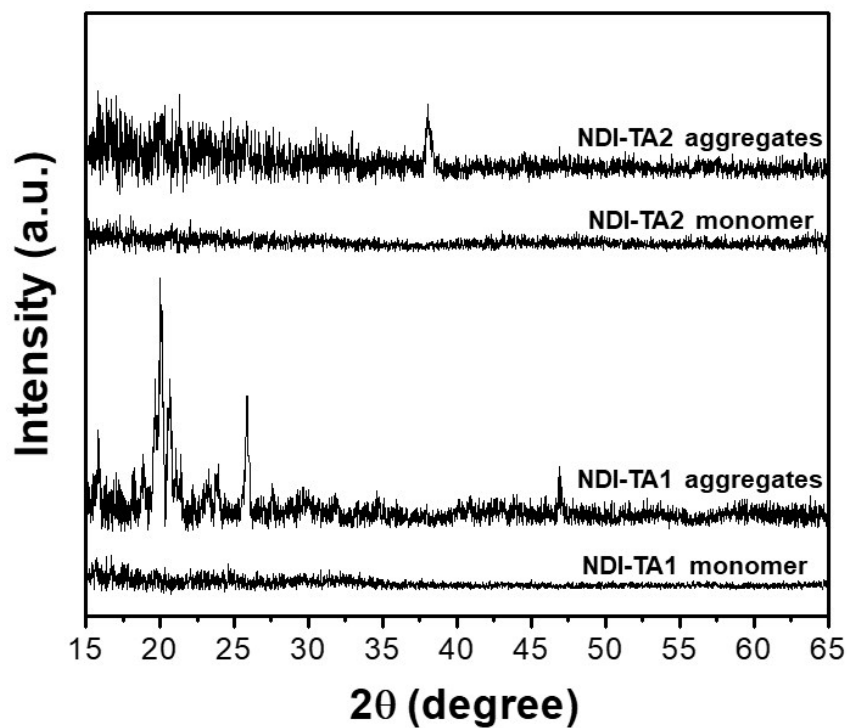

**Fig. S25** XRD patterns of NDI-TA1 and NDI-TA2 monomer and self-assembled in THF/MCH (30:70, v/v ratio) mixtures.

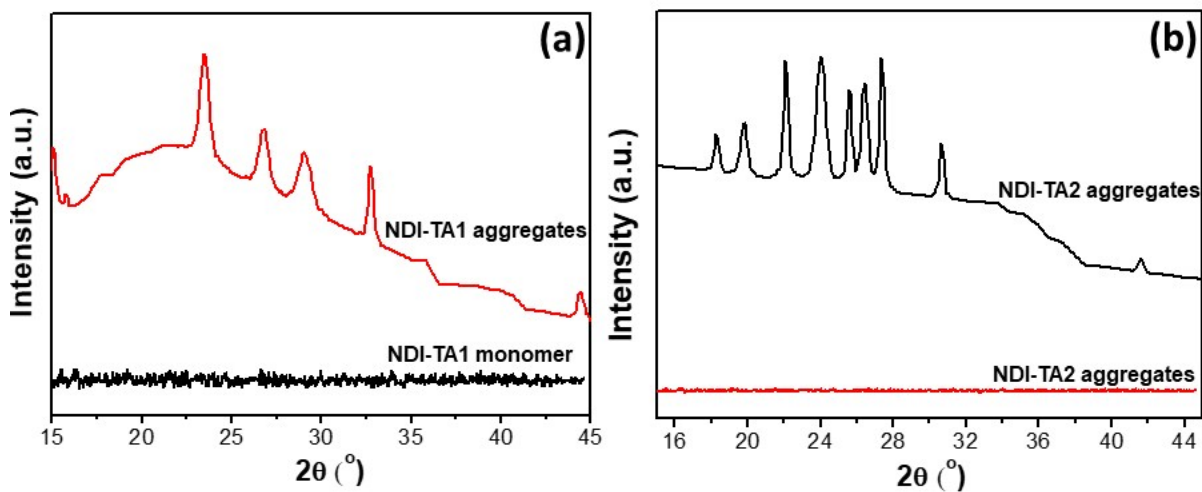

**Fig. S26** XRD patterns of (a) NDI-TA1 monomer and self-assembled in THF/H<sub>2</sub>O mixtures and (b) NDI-TA2 monomer and self-assembled in THF/H<sub>2</sub>O (30:70, v/v ratio) mixtures.



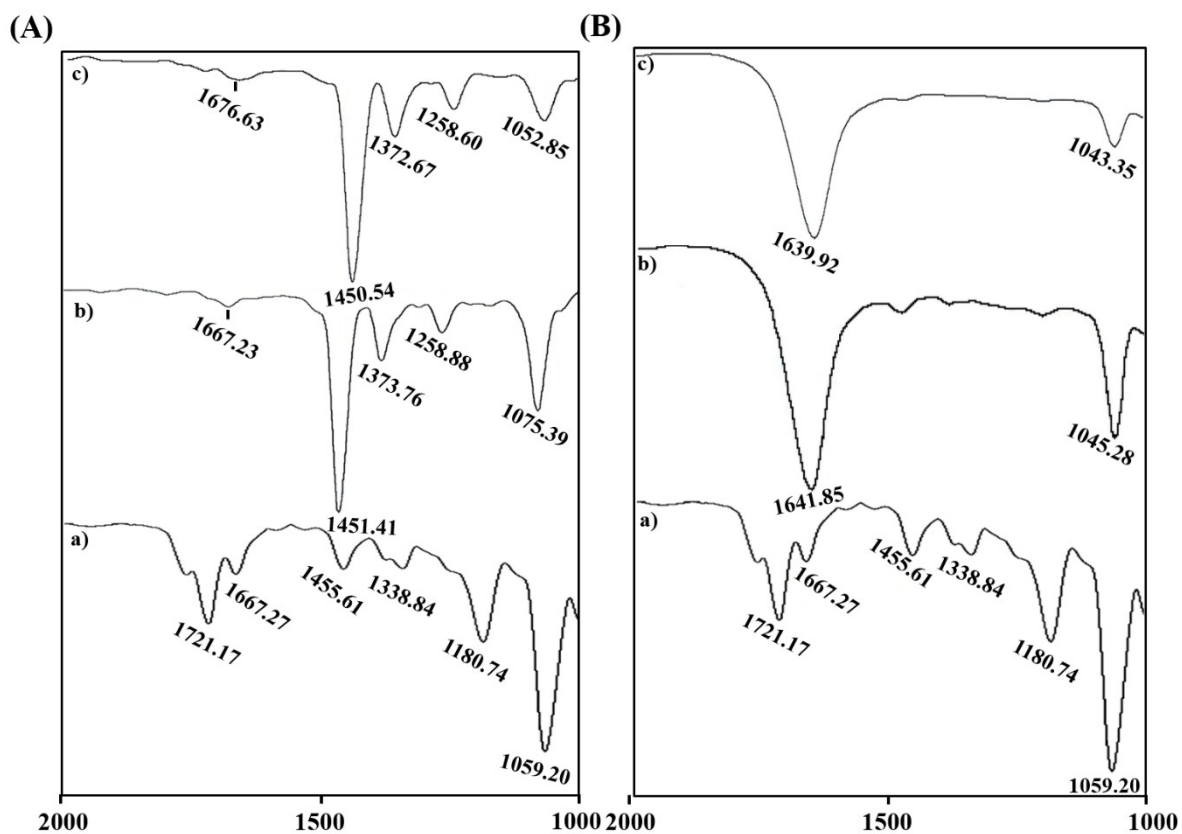

**Fig. S27** FT-IR transmission spectra of NDI-TA1 in (A) (a) THF; (b) THF:MCH (30:70, v/v); (c) THF:MCH (10:90, v/v) and (B) (a) THF; (b) THF:H<sub>2</sub>O (30:70, v/v); (c) THF:H<sub>2</sub>O (10:90, v/v).

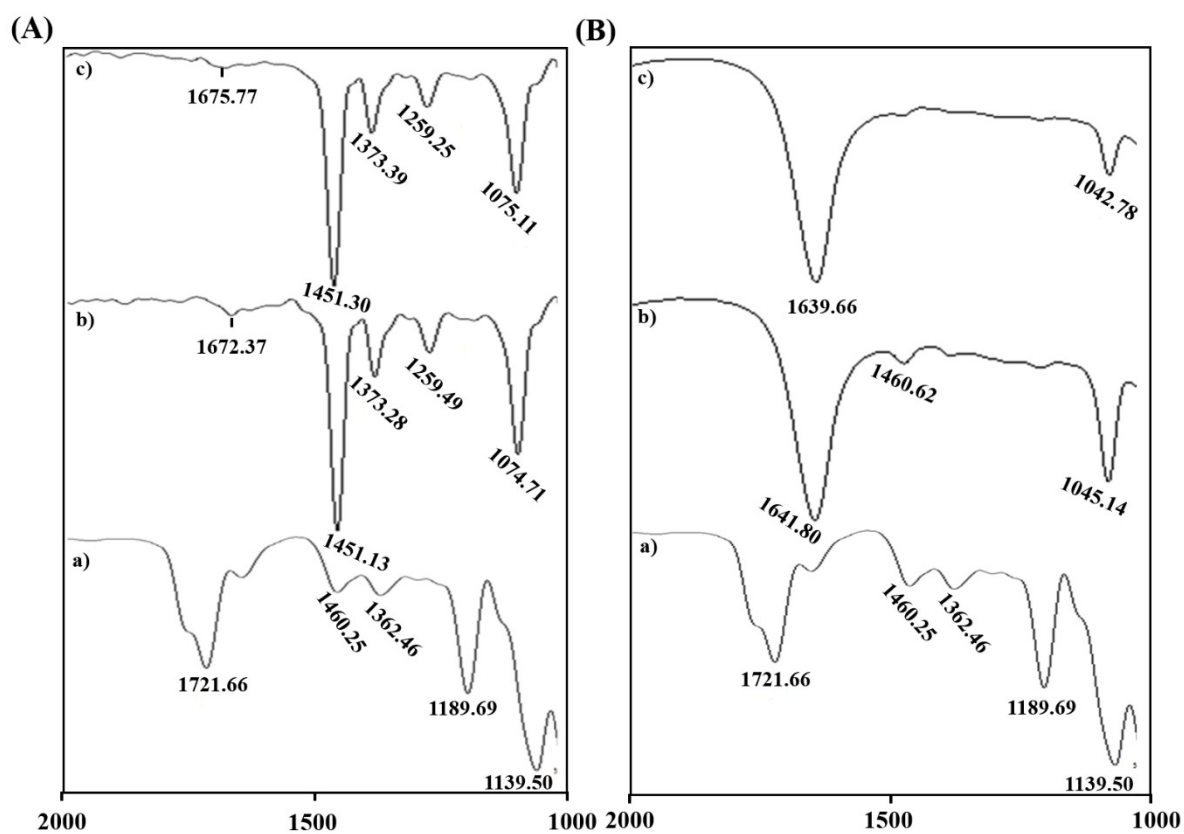

**Fig. S28** FT-IR transmission spectra of NDI-TA2 in **(A)** (a) THF; (b) THF:MCH (30:70, v/v); (c) THF:MCH (10:90, v/v) and **(B)** (a) THF; (b) THF:H<sub>2</sub>O (30:70, v/v); (c) THF:H<sub>2</sub>O (10:90, v/v).

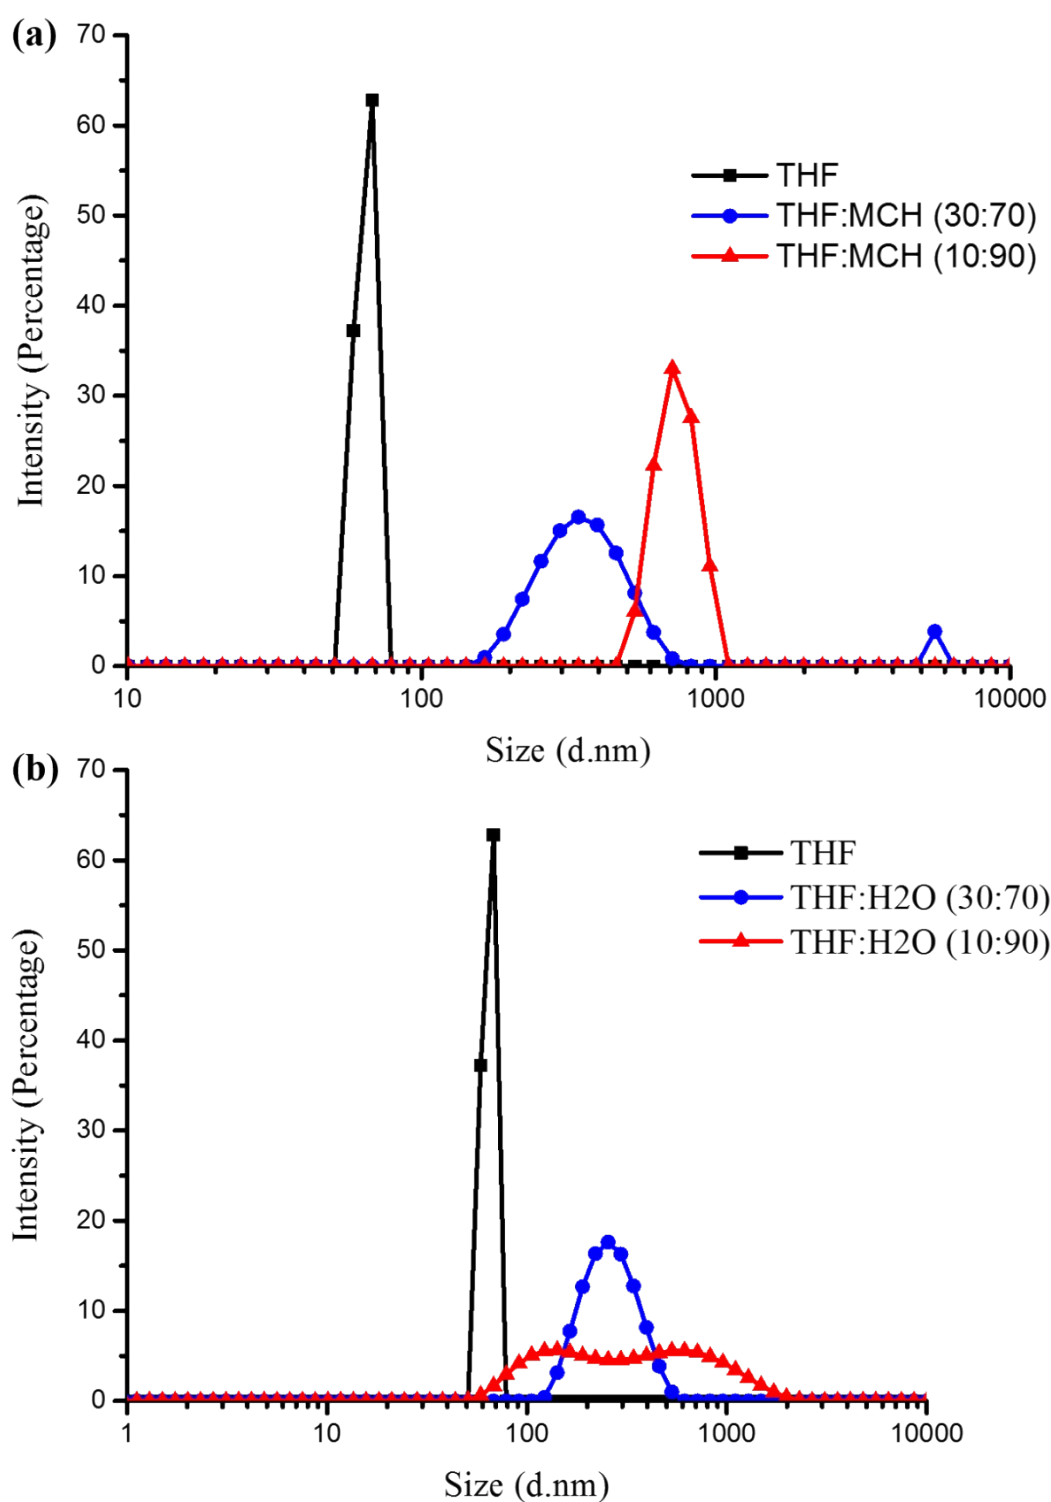

**Fig. S29** The hydrodynamic diameter distribution of NDI-TA1 self-assembly growth by addition of MCH (a), and water (b) in THF as measured using dynamic light scattering (DLS) particle size analyser.

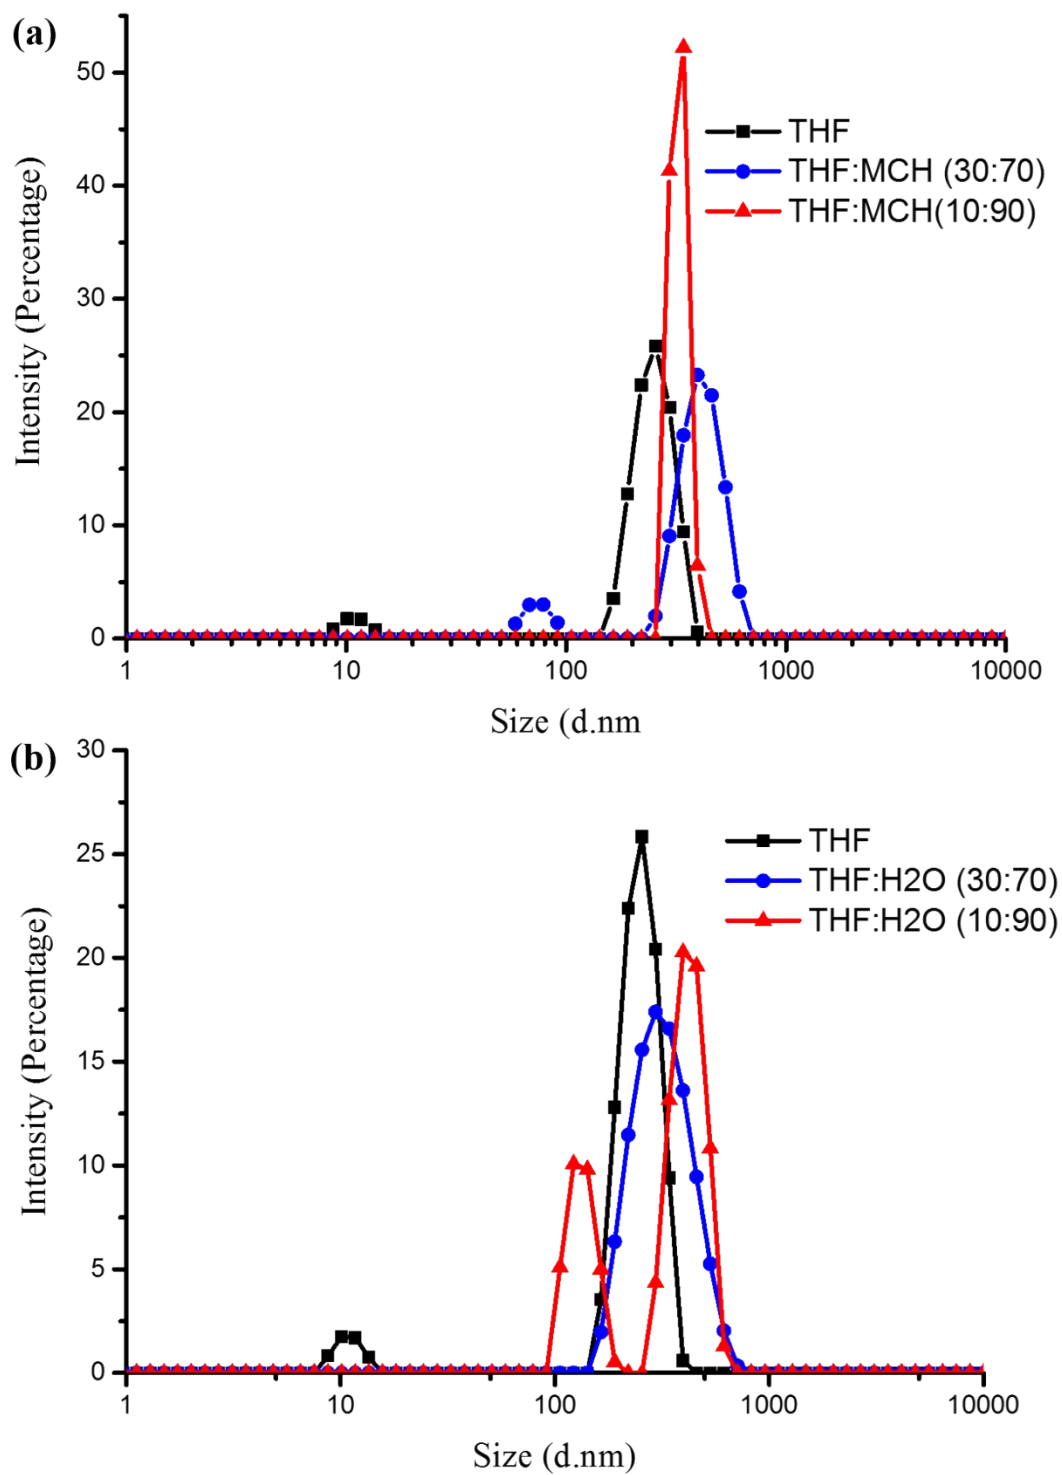

**Fig. S30** The hydrodynamic diameter distribution of NDI-TA2 self-assembly growth by addition of MCH (a), and water (b) in THF as measured using dynamic light scattering (DLS) particle size analyser.

## Molecular Modelling

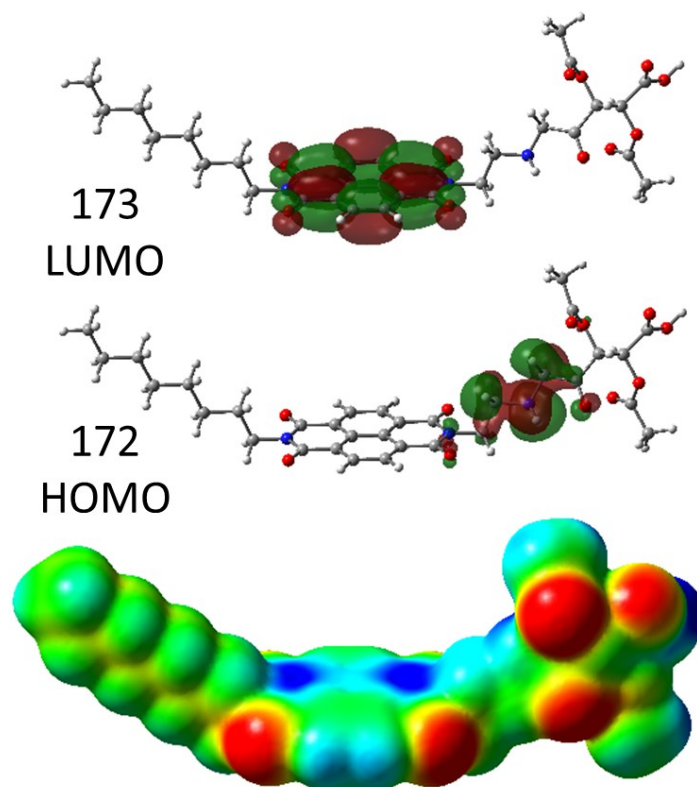

**Fig. S31** The frontier molecular orbitals HOMO and LUMO wave function and total electron density of NDI-TA1 as calculated using TDDFT at B3LYP/6-311+G(d,p) level of theory and Gauss-Sum 3.0 program.

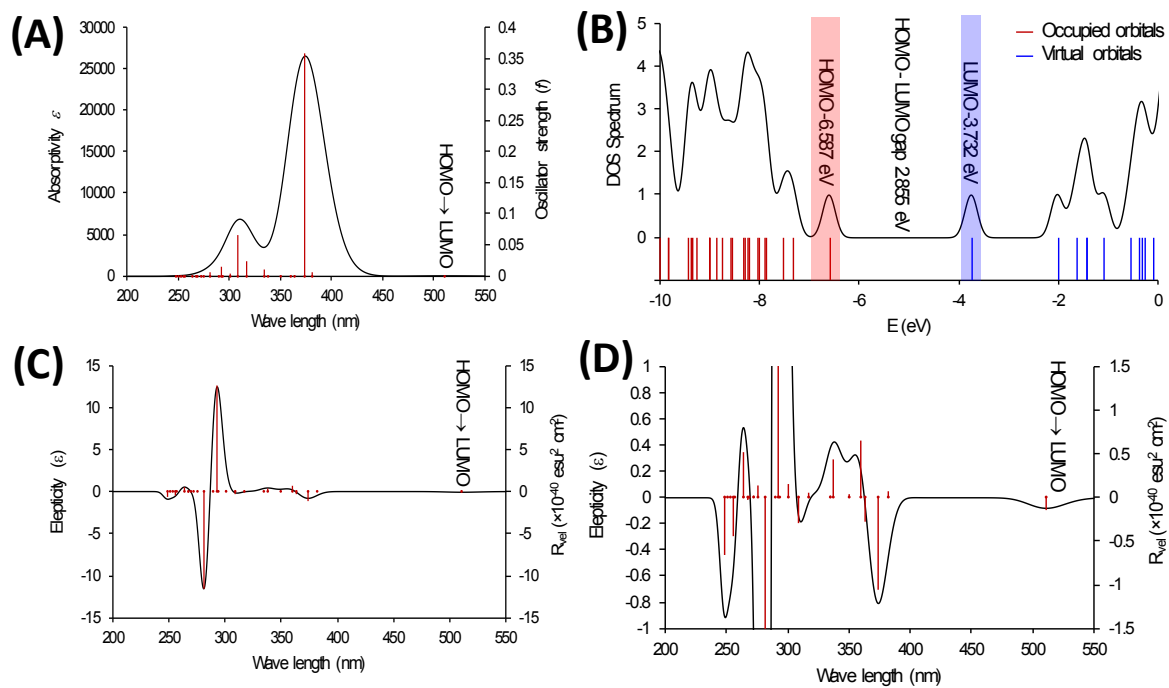

**Fig. S32** The UV-vis (A), (B) density of state (DOS), and (C and D) cyclic dichroism (CD) spectra of NDI-TA1 as calculated using TDDFT at B3LYP/6-311+G(d,p) level of theory and Gauss-Sum 3.0 program.
